# Supplementary material
Source: PubMed Central journal article supplement (PMC9264323)
Supplement: NIHMS1602633-supplement-Supplemental_Material.pdf [file NIHMS1602633-supplement-Supplemental_Material.pdf]

**Supplemental materials.**

**Figure I.** Exclusion Cascade for Multiple Social Determinants of Health and Incident Stroke

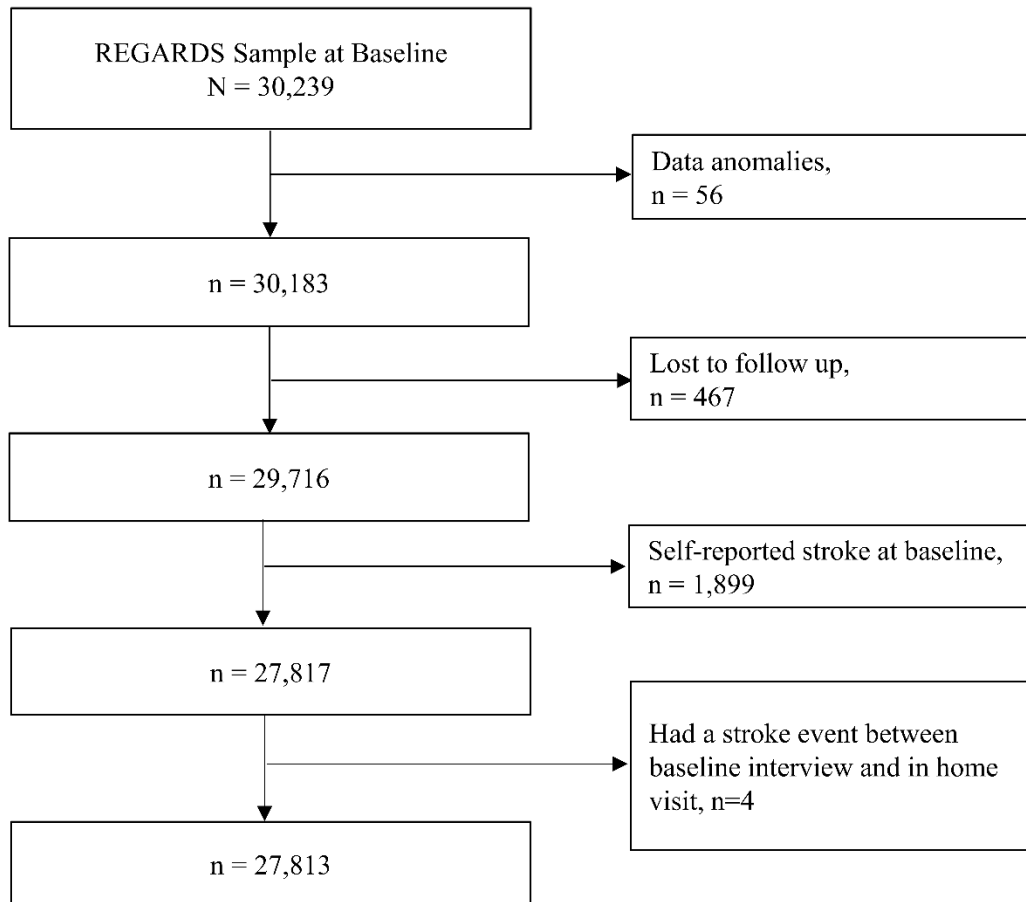

**Table I. America's Health Ranking Health Determinants Model**

| Buckets and individual determinants* | Years†   |       |       |       |       |       |       |       |       |       |
|--------------------------------------|----------|-------|-------|-------|-------|-------|-------|-------|-------|-------|
|                                      | 1993     | 1994  | 1995  | 1996  | 1997  | 1998  | 1999  | 2000  | 2001  | 2002  |
|                                      | Weights‡ |       |       |       |       |       |       |       |       |       |
| <b>1. LIFESTYLE</b>                  |          |       |       |       |       |       |       |       |       |       |
| Smoking                              | 0.182    | 0.182 | 0.182 | 0.182 | 0.182 | 0.182 | 0.182 | 0.182 | 0.182 | 0.182 |
| Motor Vehicle Deaths                 | 0.091    | 0.091 | 0.091 | 0.091 | 0.091 | 0.091 | 0.091 | 0.091 | 0.091 | 0.091 |
| Violent Crime Rate                   | 0.091    | 0.091 | 0.091 | 0.091 | 0.091 | 0.091 | 0.091 | 0.091 | 0.091 | 0.091 |
| Risk of Heart Disease                | 0.091    | 0.091 | 0.091 | 0.091 | 0.091 | 0.091 | 0.091 | 0.091 | 0.091 | 0.091 |
| Percent High School Graduation       | 0.091    | 0.091 | 0.091 | 0.091 | 0.091 | 0.091 | 0.091 | 0.091 | 0.091 | 0.091 |
| Children in Poverty                  |          |       |       |       |       |       |       |       |       | 0.091 |
| Total                                | 0.545    | 0.545 | 0.545 | 0.545 | 0.545 | 0.545 | 0.545 | 0.545 | 0.545 | 0.636 |
| <b>2. ACCESS TO CARE</b>             |          |       |       |       |       |       |       |       |       |       |
| Unemployment Rate                    | 0.091    | 0.091 | 0.091 | 0.091 | 0.091 | 0.091 | 0.091 | 0.091 | 0.091 |       |
| Adequacy of Prenatal Care            | 0.091    | 0.091 | 0.091 | 0.091 | 0.091 | 0.091 | 0.091 | 0.091 | 0.091 | 0.091 |
| Access to Primary Care               | 0.091    | 0.091 | 0.091 | 0.091 | 0.091 | 0.091 |       | 0.091 |       |       |
| Lack of Health Insurance             |          |       |       |       |       |       | 0.091 |       | 0.091 | 0.091 |
| Support for Public Health Care       | 0.091    | 0.091 | 0.091 | 0.091 | 0.091 | 0.091 | 0.091 | 0.091 | 0.091 | 0.091 |
| Total                                | 0.364    | 0.364 | 0.364 | 0.364 | 0.364 | 0.364 | 0.364 | 0.364 | 0.364 | 0.273 |
| <b>3. DISABILITY</b>                 |          |       |       |       |       |       |       |       |       |       |
| Occupational Fatalities              | 0.045    | 0.045 | 0.045 | 0.045 | 0.045 | 0.045 | 0.045 | 0.045 | 0.045 | 0.045 |
| Limited Activity Days                |          |       |       |       |       | 0.045 | 0.045 | 0.045 | 0.045 | 0.045 |
| Work Disability Status               | 0.045    | 0.045 | 0.045 | 0.045 |       |       |       |       |       |       |
| Total                                | 0.091    | 0.091 | 0.091 | 0.091 | 0.091 | 0.091 | 0.091 | 0.091 | 0.091 | 0.091 |
| All Determinants                     | 1.000    | 1.000 | 1.000 | 1.000 | 1.000 | 1.000 | 1.000 | 1.000 | 1.000 | 1.000 |

\* The model is developed by America's Health Ranking (AHR)

† The ten-year period prior REGARDS enrollment (1993-2002)

‡ The weights are provided by the America's Health Ranking; the weights were assigned based on the AHR public health expert panel

**Table II.** US States with the Worst Public Health Infrastructure in 1993-2002

| US States <sup>‡</sup> | Years <sup>*</sup> |      |      |      |      |      |      |      |      |      | Average rank<br>1993-2002 | Number of<br>years having<br>41-50 ranks |
|------------------------|--------------------|------|------|------|------|------|------|------|------|------|---------------------------|------------------------------------------|
|                        | 1993               | 1994 | 1995 | 1996 | 1997 | 1998 | 1999 | 2000 | 2001 | 2002 |                           |                                          |
|                        | Ranks <sup>†</sup> |      |      |      |      |      |      |      |      |      |                           |                                          |
| Louisiana              | 50                 | 50   | 50   | 49   | 50   | 48   | 50   | 48   | 50   | 50   | 49.5                      | 10                                       |
| Mississippi            | 48                 | 49   | 47   | 48   | 48   | 45   | 47   | 47   | 46   | 49   | 47.4                      | 10                                       |
| New Mexico             | 49                 | 35   | 46   | 47   | 49   | 49   | 49   | 50   | 49   | 48   | 47.1                      | 9                                        |
| South Carolina         | 47                 | 47   | 49   | 49   | 42   | 41   | 44   | 45   | 48   | 47   | 45.9                      | 10                                       |
| Arkansas               | 37                 | 46   | 45   | 45   | 44   | 50   | 48   | 46   | 44   | 44   | 44.9                      | 9                                        |
| Nevada                 | 40                 | 41   | 48   | 46   | 45   | 47   | 45   | 49   | 47   | 40   | 44.8                      | 8                                        |
| Florida                | 46                 | 45   | 44   | 44   | 41   | 42   | 43   | 40   | 45   | 45   | 43.5                      | 9                                        |
| Tennessee              | 41                 | 48   | 40   | 43   | 47   | 44   | 41   | 38   | 43   | 43   | 42.8                      | 8                                        |
| Texas                  | 43                 | 44   | 43   | 42   | 43   | 40   | 38   | 43   | 41   | 42   | 41.9                      | 8                                        |

<sup>\*</sup> The ten-year period prior REGARDS enrollment (1993-2002)

<sup>†</sup> Ranks provided by America's Health Ranking

<sup>‡</sup> Nine states (Louisiana, Mississippi, New Mexico, South Carolina, Arkansas, Nevada, Florida, Tennessee, Texas) fell into the bottom 20% US states with the worst public health infrastructure for at least 8 years during the ten-year period prior REGARDS enrollment (1993-2002)

**Table III.** Sensitivity Analyses

| Sensitivity analyses                                                                                              | Details on the modifications made                                                                                                                                                                                                                                                                                                                                                                                                                                                                                                                                                       |
|-------------------------------------------------------------------------------------------------------------------|-----------------------------------------------------------------------------------------------------------------------------------------------------------------------------------------------------------------------------------------------------------------------------------------------------------------------------------------------------------------------------------------------------------------------------------------------------------------------------------------------------------------------------------------------------------------------------------------|
| Used alternative definition of Stroke Belt                                                                        | In the main analysis, Stroke Belt included the following states: North Carolina, South Carolina, Georgia, Alabama, Mississippi, Tennessee, Arkansas, and Louisiana.<br>In the sensitivity analysis, we followed the National Heart, Lung, and Blood Institute (NHLBI) definition <sup>31</sup> , and added Indiana, Kentucky and Virginia to the list of states.                                                                                                                                                                                                                        |
| Included environmental tobacco use in addition to tobacco smoking to the list of covariates.                      | We added an exposure to tobacco smoke variable ('Does anyone living with you smoke cigarettes regularly?') to the list of covariates, in addition to the tobacco smoking variable.                                                                                                                                                                                                                                                                                                                                                                                                      |
| Included adherence to DASH diet to the list of covariates in addition to the adherence to the Mediterranean diet. | We broadened our definition, and we created a "high adherence to healthy diet" variable. The participants who demonstrated high adherence to either Mediterranean diet or DASH diet were considered to adhere to healthy diet. We made a decision not to include both variables to avoid collinearity. Similar to the Mediterranean diet variable, and to be consistent to other studies on DASH diet (for example, Zafarmand et al., 2020) <sup>46</sup> , we defined high adherence to DASH diet if a participant had at least a median DASH diet score, and low adherence otherwise. |

**Table IV.** Sensitivity Analyses Results\*

|                           | <75 years                       |                             | ≥75 years                       |                             |
|---------------------------|---------------------------------|-----------------------------|---------------------------------|-----------------------------|
|                           | Minimally adjusted <sup>†</sup> | Fully adjusted <sup>‡</sup> | Minimally adjusted <sup>†</sup> | Fully adjusted <sup>‡</sup> |
| <b>1 SDOH</b>             | 1.44 (1.07, 1.78)               | 1.23 (1.00, 1.52)           | 1.13 (0.82, 1.55)               | 1.08 (0.78, 1.50)           |
| <b>2 SDOH</b>             | 1.82 (1.48, 2.24)               | 1.34 (1.08, 1.66)           | 1.15 (0.83, 1.60)               | 1.03 (0.74, 1.44)           |
| <b>3+ SDOH</b>            | 2.38 (1.94, 2.92)               | 1.50 (1.20, 1.86)           | 1.40 (1.02, 1.92)               | 1.23 (0.89, 1.71)           |
| <b><i>p</i> for trend</b> | <.0001                          | 0.0002                      | 0.03                            | 0.24                        |

\* Sensitivity analyses include fully adjusted models with all changes described in Table III.

<sup>†</sup>Adjusted for age at baseline and gender

<sup>‡</sup>Adjusted for demographics, medical conditions, medication use, functional status, health behaviors, and physiologic variables with the changes described in Table III. SDOH include black race, low annual income, low education, zip code poverty, residence in the states with the worst public health infrastructure, lack of health insurance and social isolation (Not seeing friends or family members at least once a month).
